# Supplementary material for: Evolutionary dynamics and geographic dispersal of beta coronaviruses in African bats
Source: PeerJ journal article supplement (doi:10.7717/peerj.10434), 2020-11-26
Supplement: Supplemental_File_1.pdf [file Supplemental_File_1.pdf]

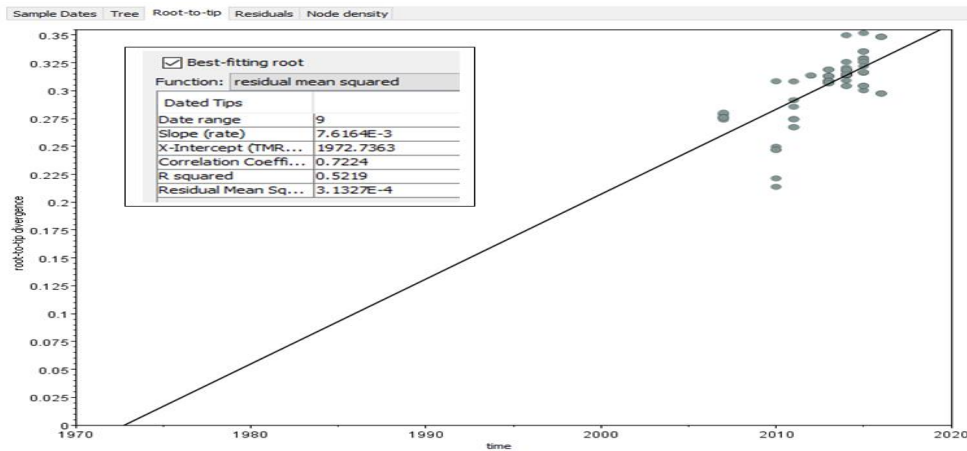

A

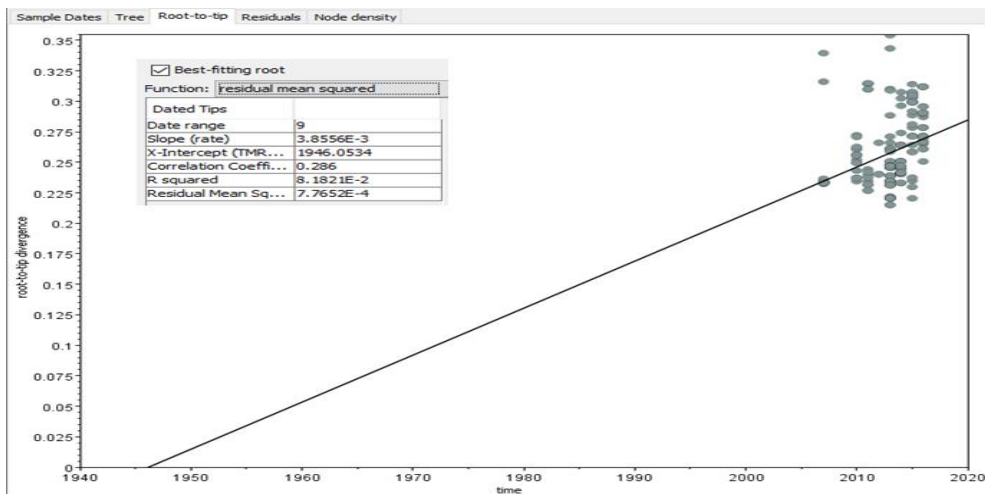

B

SupplementaryFigure 1. Root to tip regression analysis plots of the genetic distances against the year of isolation for the Bt-CoV sequences analyzed in this study. Figure 2a represents Afr-Bt-CoV, while 2b represents sequences of African, Asian and European origins.
